# Supplementary material for: A toxin-antidote CRISPR gene drive system for regional population modification
Source: PubMed Central journal article supplement (PMC7046741; doi:10.1038/s41467-020-14960-3), 2020-02-27
Supplement: 41467_2020_14960_MOESM1_ESM.pdf [file 41467_2020_14960_MOESM1_ESM.pdf]

## Supplementary Information

### **A toxin-antidote CRISPR gene drive system for regional population modification**

Champer *et al.*

**Contents:**

Supplementary Methods

Supplementary Figures 1-3

Supplementary Table 1

## Supplementary Methods

The following tables show the DNA fragments used for Gibson Assembly of each plasmid and the sequences of DNA oligos. PCR products are shown with the oligonucleotide primer pair used, and plasmid digests are shown with the restriction enzymes used.

Plasmid for assembly of the gRNAs used in the drive:

| <b>EGDhg2</b>      | <i>Template</i> | <i>Oligo/Enzyme 1</i> | <i>Oligo/Enzyme 2</i> |
|--------------------|-----------------|-----------------------|-----------------------|
| <i>PCR Product</i> | pCFD3           | CFD5h_1_F             | CFD_1_R               |
| <i>PCR Product</i> | pCFD5           | CFDh_12_F             | CFDh_12_R             |
| <i>PCR Product</i> | pCFD5           | CFD_2_F               | CFD5h_2_R             |

Plasmid for expression of the gRNAs used to transform the drive into the genome:

| <b>EGDhg2t</b>     | <i>Template</i> | <i>Oligo/Enzyme 1</i> | <i>Oligo/Enzyme 2</i> |
|--------------------|-----------------|-----------------------|-----------------------|
| <i>PCR Product</i> | pCFD3           | CFD5ht_1_F            | CFD_1_R               |
| <i>PCR Product</i> | pCFD5           | CFDht_12_F            | CFDht_12_R            |
| <i>PCR Product</i> | pCFD5           | CFD_2_F               | CFD5ht_2_R            |

Intermediate for construction of the drive plasmid:

| <b>EGDh2i1</b>        | <i>Template</i> | <i>Oligo/Enzyme 1</i> | <i>Oligo/Enzyme 2</i> |
|-----------------------|-----------------|-----------------------|-----------------------|
| <i>PCR Product</i>    | Genomic DNA     | hLeft_F               | hLeft_R               |
| <i>PCR Product</i>    | gBlock ghr      | hcode_F               | hcode_R               |
| <i>PCR Product</i>    | Genomic DNA     | h3utr_F               | h3utr_R               |
| <i>Plasmid Digest</i> | IHDyi1*         | AvrII                 | XmaI                  |

\*a plasmid backbone derived from IHDyi1, with the BsiWI site replaced by an XmaI site

Drive plasmid designed to incorporate the drive into in the genome:

| <b>EGDh2</b>          | <i>Template</i> | <i>Oligo/Enzyme 1</i> | <i>Oligo/Enzyme 2</i> |
|-----------------------|-----------------|-----------------------|-----------------------|
| <i>PCR Product</i>    | EGDhg2          | U6_h_F                | U6_h_R                |
| <i>PCR Product</i>    | Genomic DNA     | hRight_F              | hRight_R              |
| <i>Plasmid Digest</i> | EGDh2i1         | AgeI                  | XhoI                  |

## Construction primers

CFD\_1\_R: GGCTATGCGTTGTTTGTCTGC

CFD\_2\_F: AACAGTAGGCAGAACAACAACGC

CFD5h\_1\_F: GTGCAGCTGCTGCTGGGGCAGGCTCGTTTTAGAGCTAGAAATAGCAAGTTAAA

CFD5h\_2\_R: AAAAACTGTGTGAACGAGGTTAGCTGCATCGGCCGGGAATCGAAC

CFD5ht\_1\_F: GTGCAACGGTCACTTTTGTAGCGCGGTTTTAGAGCTAGAAATAGCAAGTTAAA

CFD5ht\_2\_R: AAAACCCGTTGTGCCGGCCAGCTCTGCATCGGCCGGGAATCGAAC

CFDh\_12\_F: ATGCAGCTAACCTCGTTCACACAGTGTTTTAGAGCTAGAAATAGCAAGTTAAA  
CFDh\_12\_R: AAAACGAGCCTGCCCCAGCAGCAGCTGCACCAGCCGGGAATCGAAC  
CFDht\_12\_F: ATGCAGAGCTGGGCCGGCACAACGGGTTTTAGAGCTAGAAATAGCAAGTTAAA  
CFDht\_12\_R: AAAACCGCCGCTCAAAAGTGACCGTTGCACCAGCCGGGAATCGAAC  
h3utr\_F: GTAAAGGGTGTCTGCATATGCATATCA  
h3utr\_R: AATTGAATTAGTCTCTAATTGAATTAGATCCGAGCTCACCCAGGAAAAGATACCCCAAC  
hcode\_F: CGTTCTGGGCACCGCCGTGGTCCCCGCTCAA  
hcode\_R: ATATGATATGCATATGCAGACACCCTTTACCAC  
hLeft\_F: ATTAACCAATTCTGAACATTATCGCCTAGGGTACCGAAGCAGCAACAACACCAACACCAC  
hLeft\_R: TGAGCGGGGACCACGGCGGTGCCCAGAACGTT  
hRight\_F: TTAATGCGTATGCATCGCTCAAAAGTGACCGTCG  
hRight\_R: TCGCCCTTGAACCTTGATTGACGGAAGAGCCTCGAGTCGATTAGTCACGGCTTTTGC  
U6\_h\_F: GGTGGTCCAAACTCATCAATGTATCTTAACGCGTTTTTTTTGCTCACCTGTGATTGC  
U6\_h\_R: GGTCACCTTTGAGCGATGCATACGCATTAAGCGAACA

## Sequencing primers

h3utr\_S\_F: AAGGACCTTCATCAGACGCAC  
h3utr\_S\_R: GTTTGGCGATGTCCTGGTAGA  
hCut\_S\_F: CCAAATTGGAAAAGCCGACA  
hCut\_S\_R: AACATGGGTTGCTGTTGTGC  
hLeft\_S\_F: TCAGATTTGCTGCCAAGTGAAA  
hLeft\_S\_R: CCAGAACGTTGGTCATGTTGG  
hRec\_S\_F: TCATGCTCAAATGTTGCCGAG  
hRec\_S\_R: AATGACTTGCATTCCGTTCCG  
hRight\_S\_F: CGTGCAAAGCCGTGACTAAT  
hRight\_S\_R: TAGTAAATGCCACCAACGCGA  
pCFD5\_S\_R: ACGTCAACGGAAAACCATTGTCTA

These sequencing primers were all used to confirm plasmid sequences. For genotyping PCR, the primers hCut\_S\_F and hCut\_S\_R were used to determine sequences of cut sites as described in the methods.

## gBlock

ghr:

GCCGTGGTCCCCGCTCAACTGAAAGAAACCCCCCTGAAGAGCGATCGCCGCAGCAATAAACCGATTATGGAAAAGCG  
TCGCCGCGCTCGCATCAATAATTGCCTGAACGAGCTGAAAACCTTGATCTTGGACGCTACGAAGAAGGATCCCCGCC  
GTCATAGCAAGCTGGAGAAAGCTGATATCTTGGAAAAAACCGTGAAACACTTGCAAGAATTGCAACGTCAACAAGCC  
GCTATGCAACAAGCTGCTGACCCGAAAATCGTCAATAAGTTTTAAAGCTGGCTTTGCTGATTGCGTCAATGAAGTGTC  
CCGTTTTCCCGGAATTGAACCGGCTCAACGCCGCCGTTTTGCTGCAACATTTGTCCAATTGTATTAACGGAGTGAAAA  
CCGAATTGCATCAACAACAACGTCAACAACAGCAACAAGCATTGCTCAAATGTTGCCGAGCCCCCGTCCAGC  
CCCGAACAAGACTCCCAACAAGGCGCCGCCCGCCGTTATCTGTTCCGCATTCAACAACCGCTTCCGGCTATTTCTT  
GCCGAACGGAATGCAAGTCATTCCGACGAAATTGCCGAATGGCTCCATCGCTCTGGTCCTGCCGCAATCCCTGCCGC  
AACAGCAACAGCAACAGCTGCTCCAACATCAACAGCAACAGCAACAGTTGGCCGTGGCTGCCGCTGCCGCCGCTGCC  
GCTGCCGCGCAGCAACAGCCGATGCTGGTGTCCATGCCGCAACGCACCGCTTCCACGGGCAGCGCTTCCAGCCATAG  
CAGCGCTGGCTATGAAAGCGCCCCGGGCTCCTCCTCCTCCTGCTCCTATGCTCCCCGAGCCCCGCTAATAGCTCCT

ATGAACCGATGGATATTTAAACCCAGCGTGATTCAACGTGTCCCCATGGAACAACAACCGTTGAGCTTGGTCAATTAAG  
AAACAGATTAAGGAAGAAGAACAACCGTGGCGCCCGTGGTAAAGGGTGTCTGCATATGCATATC

## Drive parameter calculations

Drive parameters were estimated by counting the number of flies with specific phenotypes among the progeny from crosses of D/+ heterozygotes with wild-type individuals. To calculate rates from these counts, we employed two different approaches. In the first approach, we simply pooled all offspring from the same type of cross together and then calculated rates from the combined overall counts of progeny with the listed phenotypes according to following equations:

$$\text{Drive inheritance rate} = \frac{\text{\#dsRed flies}}{\text{\#total flies}}$$

$$\text{Egg-to-pupae survival rate} = \frac{\text{\#pupae}}{\text{\#eggs}}$$

$$\text{Egg-to-pupae survival rate relative to wild-type} = \frac{\text{egg-to-pupae survival rate}}{\text{egg-to-pupae survival rate of wild-type}}$$

$$\text{Expected egg-to-pupae survival rate relative to wild-type} = \frac{0.5}{\text{drive inheritance}}$$

(based off the expectation of an essential but haplosufficient target gene)

The resulting rates are shown in Figures 4 and 5, together with standard errors of the mean (SEM) obtained under a model of binomial sampling. All specific calculations are provided in the Supplementary Data Sets 1-3.

A potential issue of this pooling approach is that batch effects (groups of offspring were raised in separate vials with different parents) could distort the rate and error estimates. In our second approach we sought to account for such effects by using a generalized linear mixed-effects model with a binomial distribution (fit by maximum likelihood, Adaptive Gauss-Hermite Quadrature, nAGQ = 25). Such a model allows for variance between batches, resulting in potentially different rate estimates and increased error estimates. Offspring from a single vial were considered as a separate batch, even if they had the same parents with offspring from other vials. This analysis was performed using the R statistical computing environment (3.6.1) with the packages lme4 (1.1-21, <https://cran.r-project.org/web/packages/lme4/index.html>) and emmeans (1.4.2, <https://cran.r-project.org/web/packages/emmeans/index.html>). The specific R script we used for this analysis is available on Github (<https://github.com/MesserLab/Binomial-Analysis>). The resulting rate estimates and errors from this alternative analysis were similar to the pooled analysis and are provided in the Supplementary Data Sets 1-3.

```

original      ATGGTTACCGGCGTAACAGCAGCCAACATGACCAACGTTCTGGGCACCGCCGTTGTGCCG 60 first recoded codon
recoded      ATGGTTACCGGCGTAACAGCAGCCAACATGACCAACGTTCTGGGCACCGCCGTTGTGCCC 60
              *****
              intron in original sequence
original      GCCCAGCTCAAGGAGACGCCGCTCAAAGTGACCGTCGGTFCGAACAAGCCATCATGGAG 120
recoded      GCTCAACTGAAAGAAACCCCCCTGAAGAGCGATCGCCGCAGCAATAAACCGATTATGGAA 120
              *****
              intron in original sequence
original      AAACGCCGACGTGCCCGTATTAACAAGTCTCAATGAACTCAAGACTCTGATTCTGGAT 180
recoded      AAGCGTCGCCGCGCTCGCATCAATAATGCGCTGAACGAGCTGAAAACCTGATCTTGAC 180
              *****
              intron in original sequence
original      GCCACCAAAAAGACCCGGCTCGCCACTCAAATTGGAAAAGGCCGACATTCTGGAGAAG 240
recoded      GCTACGAAGAAGGATCCCGCCCGTCATAGCAAGCTGGAGAAAGCTGATATCTTGAAAAA 240
              *****
original      ACAGTAAAGCATCTGCAGGAGCTGCAGCGCCAGCAGCCATGCAGCAGGCCCGCGAT 300
recoded      ACCGTGAAACACTTGCAGAAATTGCAACGTCAACAAGCCGCTATGCAACAAGCTGCTGAC 300
              *****
original      CCCAAGATTGTGAACAAATTCAAGGCCGGATTGCGCCACTGTGTGAACGAGGTTAGCCG 360
recoded      CCGAAAATCGTCAATAAGTTTAAAGCTGGCTTGTGATTCGCTCAATGAAGTGTCCCGT 360
              *****
original      TTTCCCGGCATCGAGCCCGCCAGCGTTCGTCGCTGCTACAGCACCTGAGCAACTGCATC 420
recoded      TTCCCGGAATGAAACCGGCTCAACGCCCGGTTTGTGCAACATTTGTCCATTTGATATT 420
              *****
original      AATGGCGTTAAGACAGAGCTGCACCAGCAGCAGCCAGCAGCAACAGCAGTCCATCCAC 480
recoded      AACGGAGTGAAAACCGAATTGCATCAACAACAACGTCAACAACAGCAACAAAGCATTAT 480
              *****
original      GCCCAGATGCTGCCCTCGCCGCCAGCTCGCCGGAGCAGGATAGCCAGCAGGGAGCAGCG 540
recoded      GCTCAAATGTTGCCGAGCCCCCGTCCAGCCCCGAACAAGACTCCAACAAGGCCGCC 540
              *****
original      GCACCCTACCTCTTTGGTATCCAGCAGACGGCCAGCGTTACTTTCTGCCCAATGGCATG 600
recoded      GCCCCGTATCTGTTCCGCATTCAACAAACCGCTTCCGGCTATTTCTTGCCGAACGGAATG 600
              *****
original      CAGGTGATCCCCCAAGCTGCCCAACGGTAGCATTCGCCCTCGTGTGCCCCAGAGCCTG 660
recoded      CAAGTCATTCGCAGCAAAATGCGCAATGGCTCCATCGCTCTGGTCTGCCGCAATCCCTG 660
              *****
original      CCCCAGCAGCAGCAGCAACAGTTGCTGCAGCACCACAGCAGCAGCAACTCGCCGTC 720
recoded      CCGCAACAGCAACAGCAACAGCTGCTCCAACATCAACAGCAACAGCAACAGTTGGCCGTG 720
              *****
original      GCAGCAGCAGCAGCGGCCGAGCAGCAGCACAACAGCAACCCATGTTGGTCCAGCATGCC 780
recoded      GCTGCCGTGCGGGCCGCTGCCGCTGCCGCGCAGCAACAGCCGATGTTGGTGTCCATGCC 780
              *****
original      CAGCGTACAGCCAGCACCAGGATCCGCCAGCTCGCACTCCTCCGCCGATACGAGTCGGC 840
recoded      CAACGCACCGCTTCCACGGCAGCGCTTCCAGCCATAGCAGCGCTGGCTATGAAAGCGCC 840
              *****
original      CCCGGAAGCAGCAGCAGCTGTAGCTACGCCCCCGCCAGTCCGGCCAACCTAGCTACGAG 900
recoded      CCGGGCTCCTCCTCCTGCTCCTATGCTCCCCCGAGCCCGCTAATAGCTCCTATGAA 900
              *****
original      CCCATGGACATCAAGCCATCGGTCATCCAGCGGTGCCAATGGAGCAGCAGCCCTGTGCG 960
recoded      CCGATGGATATTAACCCAGCGTATTCAACGTGTCCCATGGAACAACAACCGTTGAGC 960
              *****
original      CTGGTGATCAAGAAGCAGATCAAGGAGGAGGAGCAGCCCTGGCGGCCCTGGTAG1014
recoded      TTGGTCATTAAGAAACAGATTAAGGAAGAAGAACAACCGTGGCGCCCGTGGTAA1014
              *****

```

**Supplementary Figure 1. Recoded *h* sequence alignment.** Alignment between the original *h* sequence and the recoded version is shown, with “\*” indicating an identical nucleotide. The locations of the first recoded codon and the two introns are also shown.

### A Desired homology-directed repair

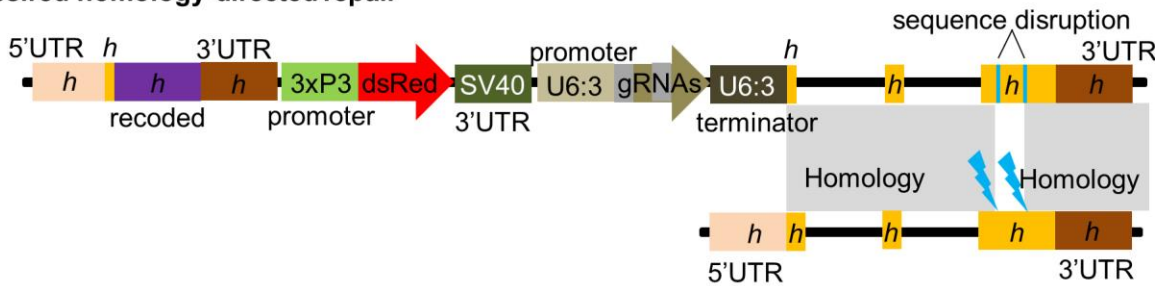

### B Undesired homology-directed repair of the full drive

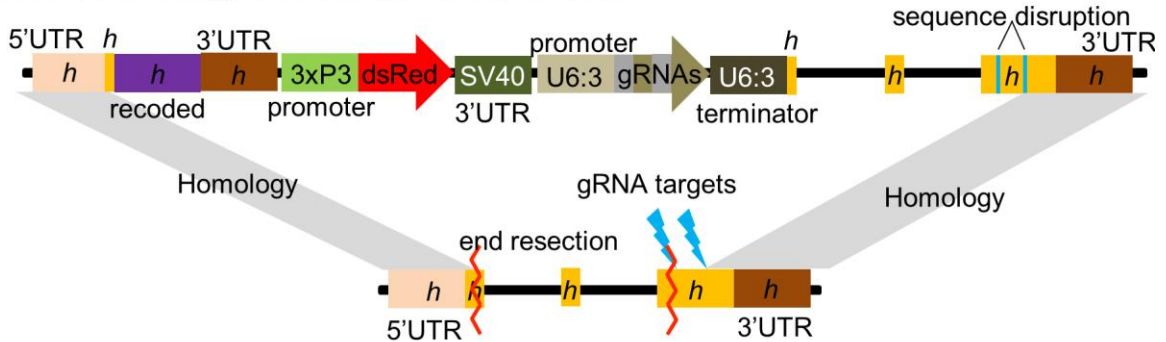

### C Undesired homology-directed repair of the recoded sequence

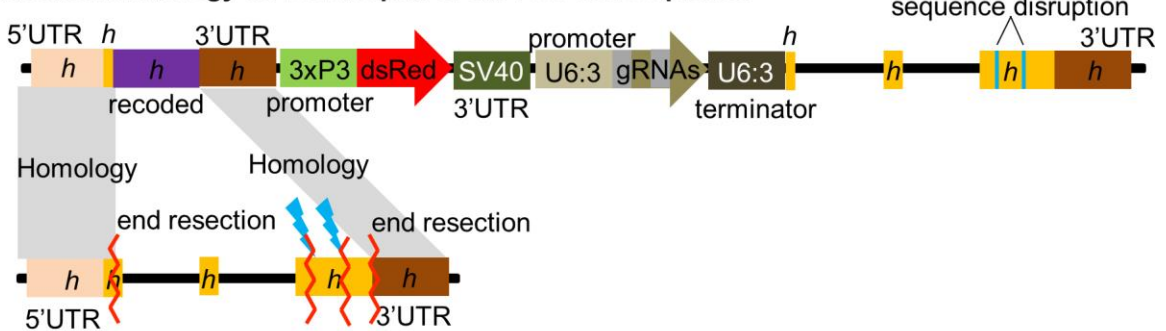

**Supplementary Figure 2. Homology-directed repair possibilities in the TARE drive.** (A) The homology between the drive construct and wild-type allele during “correct” homology-directed repair that results in copying the sequence disruptions in the drive allele. This form of homology-directed repair has the same effect as end-joining, with the added advantage that the repair is certain to disrupt the sequence (sequential end-joining events could potentially form a rare r1 resistance allele, depending on the sequence changes). (B) It is possible that homology-directed repair copies the entire drive allele. However, end resection must proceed for over ~1.4 kb on the left side of the cut sites, which may be rare, and this pathway would also be competing with the one in (A). If this happens at a small rate, overall drive dynamics are not likely to be affected. (C) It is also possible that homology-directed repair copies only the recoded sequence, immediately forming a functional r1 resistance allele. This would have a substantial negative effect on drive success. However, this event should be quite rare, since in addition to the end resection in (B), end resection would need to also proceed for over ~350 nucleotides to the right of the cut site, and it would then only be able to use the 3'UTR element near the recoded area as the homology template. It would also need to compete with the pathways in (A) and (B).

Wild Type:  
 Site 1: GATTCG**CCGACT** GTGTGAACGAGGTTAGCCGCTTTCCC  
 Site 2: GTTGCC**CCAGAG** CCTGCC**CCAGCAGCAGC**AGCAACAGT

"11" sequence  
 Site 1: GATTC-----CC  
 Site 2: GTTGCC**CCAG**-----CAGCAGCAGCAACAGT

"13" sequence  
 Site 1: GATTCG**CCGAC**-----GAGGTTAGCCGCTTTCCC  
 Site 2: GTTGCC**CCAGAG**-----TG**CC**CCAGCAGCAGCAGCAACAGT

**Supplementary Figure 3. Sequences of h cuts sites for the lines used in the cage experiment.** Sequences of lines used in the experiment ("11" and "13") are displayed. Red indicates the sequences of gRNA target sites and orange indicates protospacer-adjacent motifs (PAMs). Purple dashed lines indicate deletions from the wild-type sequence.

**Supplementary Table 1**

| <b>Sequenced individual</b>       | <b>Cut site 1</b> | <b>Cut site 2</b> |
|-----------------------------------|-------------------|-------------------|
| Drive mother, dsRed offspring     | mutated           | wild-type         |
| Drive mother, dsRed offspring     | mutated           | wild-type         |
| Drive mother, dsRed offspring     | wild-type         | mutated           |
| Drive mother, dsRed offspring     | wild-type         | mutated           |
| Drive mother, dsRed offspring     | wild-type         | mosaic            |
| Drive mother, dsRed offspring     | wild-type         | wild-type         |
| Drive mother, wild-type offspring | mutated*          | mutated*          |
| Drive mother, wild-type offspring | mutated           | wild-type         |
| Drive mother, wild-type offspring | mutated           | wild-type         |
| Drive mother, wild-type offspring | mosaic            | mosaic            |
| Drive mother, wild-type offspring | mosaic            | wild-type         |
| Drive mother, wild-type offspring | wild-type         | mutated           |
| Drive father, wild-type offspring | mutated*          | mutated*          |
| Drive father, wild-type offspring | mutated           | mutated           |
| Drive father, wild-type offspring | mutated           | mutated           |
| Drive father, wild-type offspring | mutated           | wild-type         |
| Drive father, wild-type offspring | wild-type         | mutated           |
| Drive father, wild-type offspring | wild-type         | wild-type         |

\*Sequencing showed a deletion between both cut sites, indicating simultaneous cleavage.

**Supplementary Table 1. Other *h* cut site sequence analysis.** Due to the presence of multiple sequences in all individuals, *h* cut sites were distinguished by type (wild-type, mutated, or mosaic). dsRed offspring with a drive mother have a mutated cut sequence that is part of the drive allele. The table shows the type of the other allele. Similarly, the wild-type offspring all had a wild-type allele, and the sequence type shown is the type of the other allele. Mosaic sequences are formed by maternal Cas9 cleavage past the zygote stage, usually resulting in a high degree target sequence variation within an individual.
